# Supplementary material for: Immunoinformatic Execution and Design of an Anti-Epstein–Barr Virus Vaccine with Multiple Epitopes Triggering Innate and Adaptive Immune Responses
Source: MDPI journal article supplement (doi:10.3390/microorganisms11102448), 2023-09-29
Supplement: s1 [file s1]

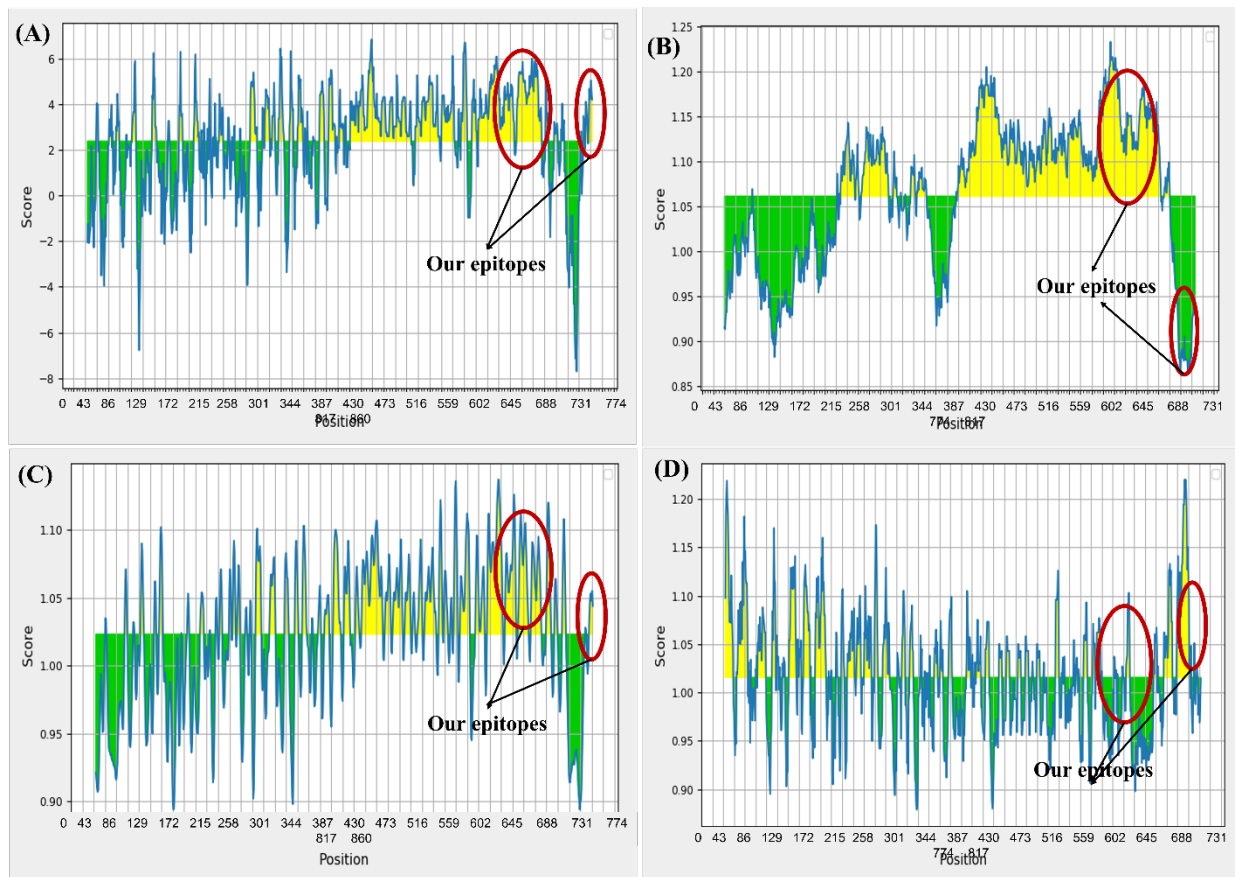

**Figure S1:** Graphical representation of the immunogenic epitopes. (A) B-turn prediction; (B) Surface accessibility; (C) Flexibility; (D) Antigenicity.

|                                             |                                             |  |        |        |  |                                             |                                                |  |        |        |  |
|---------------------------------------------|---------------------------------------------|--|--------|--------|--|---------------------------------------------|------------------------------------------------|--|--------|--------|--|
| Query= FVC2                                 |                                             |  | (A)    |        |  | Query= FVC2                                 |                                                |  | (B)    |        |  |
| Length=386                                  |                                             |  |        |        |  | Length=386                                  |                                                |  |        |        |  |
| Sequences producing significant alignments: |                                             |  | Score  | E      |  | Sequences producing significant alignments: |                                                |  | Score  | E      |  |
|                                             |                                             |  | (Bits) | Value  |  |                                             |                                                |  | (Bits) | Value  |  |
| drugbank_target P03200                      | Envelope glycoprotein GP350 (D800632)       |  | 128    | 1e-032 |  | tr B4DLN1 B4DLN1_HUMAN                      | cDNA FLJ60124, highly similar to Mitochondrial |  | 53.9   | 2e-007 |  |
| drugbank_target P68344                      | Envelope glycoprotein GP340 (D800632)       |  | 127    | 3e-032 |  | sp P52815 RM12_HUMAN                        | 39S ribosomal protein L12, mitochondrial O...  |  | 49.3   | 1e-006 |  |
| T23459 VGP3_EBVP3                           |                                             |  | 127    | 3e-032 |  | sp O60244 MED14_HUMAN                       | Mediator of RNA polymerase II transcripti...   |  | 33.5   | 0.62   |  |
| T69200 SIMCA4_HUMAN                         |                                             |  | 29.3   | 2.3    |  | tr H3BQK9 H3BQK9_HUMAN                      | Microtubule-actin cross-linking factor 1...    |  | 33.1   | 0.82   |  |
| drugbank_target Q8IC05                      | Heat shock protein 90 (D811638)             |  | 28.9   | 2.6    |  | tr H3BPE1 H3BPE1_HUMAN                      | Microtubule-actin cross-linking factor 1...    |  | 33.1   | 0.83   |  |
| drugbank_target Q04609                      | Glutamate carboxypeptidase 2 (D800089; D... |  | 28.1   | 4.4    |  | sp Q9UL36 ZN236_HUMAN                       | Zinc finger protein 236 OS=Homo sapiens O...   |  | 31.2   | 2.8    |  |
| T97071 FOLH1_HUMAN                          |                                             |  | 28.1   | 4.4    |  | tr J9JID5 J9JID5_HUMAN                      | Zinc finger protein 236 OS=Homo sapiens ...    |  | 31.2   | 3.1    |  |
|                                             |                                             |  |        |        |  | tr H3BP71 H3BP71_HUMAN                      | E3 ubiquitin protein ligase OS=Homo sapi...    |  | 30.4   | 4.9    |  |
|                                             |                                             |  |        |        |  | tr A0A804HI87 A0A804HI87_HUMAN              | Alstrom syndrome protein 1 (Frag...            |  | 30.4   | 5.3    |  |
|                                             |                                             |  |        |        |  | sp O75150 BRE1B_HUMAN                       | E3 ubiquitin-protein ligase BRE1B OS=Homo...   |  | 30.4   | 5.5    |  |
|                                             |                                             |  |        |        |  | tr A0A804HKP4 A0A804HKP4_HUMAN              | Alstrom syndrome protein 1 (Frag...            |  | 30.0   | 7.6    |  |
|                                             |                                             |  |        |        |  | tr H3BUR1 H3BUR1_HUMAN                      | Protein 4.2 (Fragment) OS=Homo sapiens O...    |  | 28.5   | 8.5    |  |
|                                             |                                             |  |        |        |  | tr A0A2R8Y4P4 A0A2R8Y4P4_HUMAN              | Transcription activator BRG1 OS=...            |  | 29.6   | 8.5    |  |
|                                             |                                             |  |        |        |  | tr A0A2R8Y7S2 A0A2R8Y7S2_HUMAN              | Transcription activator BRG1 OS=...            |  | 29.6   | 8.6    |  |

  

|                                             |                                                |  |        |          |  |            |    |           |              |          |             |        |           |
|---------------------------------------------|------------------------------------------------|--|--------|----------|--|------------|----|-----------|--------------|----------|-------------|--------|-----------|
|                                             |                                                |  | Score  | E (C)    |  | Serial No. |    |           | Epitope Name | Sequence | Method      | Result | Score (D) |
| Sequences producing significant alignments: |                                                |  | (Bits) | Value    |  |            |    |           |              |          |             |        |           |
| sp Q32AF8 RL7_SHIDS                         | 50S ribosomal protein L7/L12 OS=Shigella dy... |  | 228    | 5.00E-74 |  | 1          | E1 | LRLTPRPVS | SVM          | POSITIVE | 0.31056275  |        |           |
| sp Q31U11 RL7_SHIBS                         | 50S ribosomal protein L7/L12 OS=Shigella bo... |  | 228    | 5.00E-74 |  | 2          | E2 | VLQWASLAV | SVM          | POSITIVE | 0.16185077  |        |           |
| tr F1XJ52 F1XJ52_ECO57                      | 50S ribosomal protein L7/L12 OS=Escheric...    |  | 228    | 5.00E-74 |  | 3          | E3 | VVRAQGLDV | SVM          | POSITIVE | 0.5550728   |        |           |
| sp P0A7K5 RL7_SHIFL                         | 50S ribosomal protein L7/L12 OS=Shigella fl... |  | 228    | 5.00E-74 |  | 4          | E4 | WASLAVLTL | SVM          | POSITIVE | 0.1626063   |        |           |
| sp P0A7K5 RL7_SHIFL                         | 50S ribosomal protein L7/L12 OS=Shigella fl... |  | 228    | 5.00E-74 |  | 5          | E5 | WTFTSPPVV | SVM          | NEGATIVE | -0.80908108 |        |           |
| sp A8AKU0 RL7_CITK8                         | 50S ribosomal protein L7/L12 OS=Citrobacter... |  | 226    | 4.00E-73 |  |            |    |           |              |          |             |        |           |
| sp A6TGN9 RL7_KLEP7                         | 50S ribosomal protein L7/L12 OS=Klebsiella ... |  | 226    | 6.00E-73 |  |            |    |           |              |          |             |        |           |
| tr D0ZQV3 D0ZQV3_SALT1                      | 50S ribosomal protein L7/L12 OS=Salmonel...    |  | 224    | 3.00E-72 |  |            |    |           |              |          |             |        |           |

**Figure S2:** (A) Druggability blast of the vaccine candidate. (B) homology analysis of the vaccine candidate with gut microbiota. (C) homology analysis of the vaccine candidate with the human host. (D) IFN-gamma stimulation potential of the MHC-II-restricted epitopes.

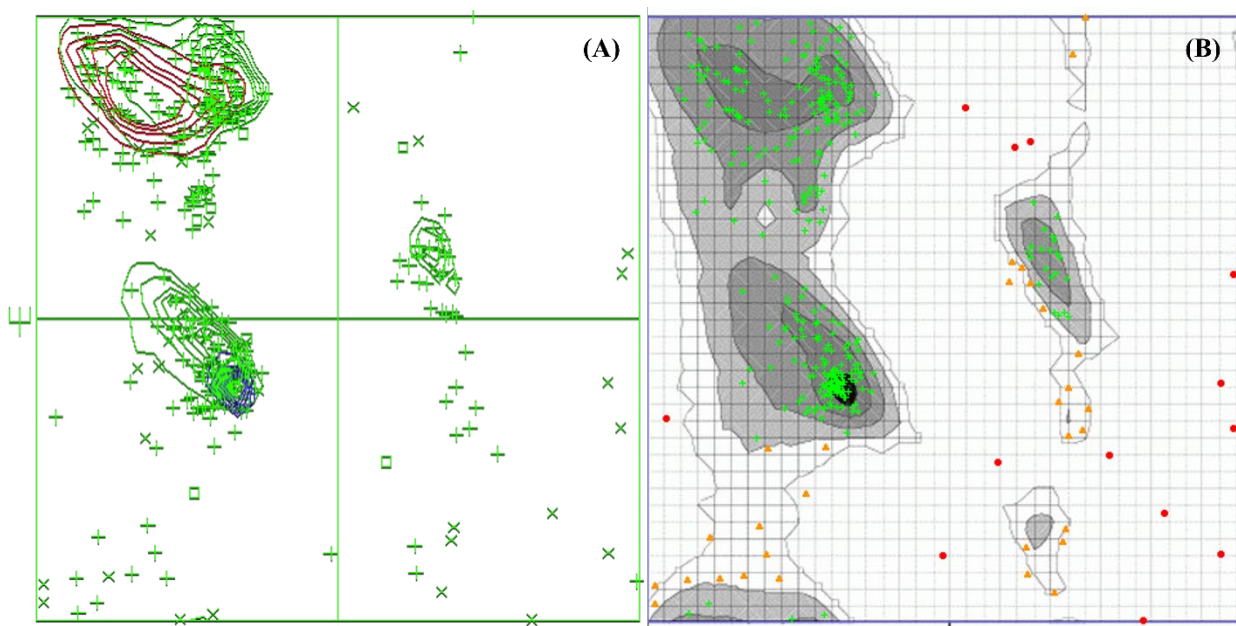

**Figure S3:** (A) Ramachandran plot computed using the WHAT IF server illustrating the most preferred region amino acids as +, and preferred region amino acids as x; (B) Ramachandran plot computed using the Z-lab server showing green residues in the most preferred regions, yellow in the preferred regions, and red in the questionable regions.

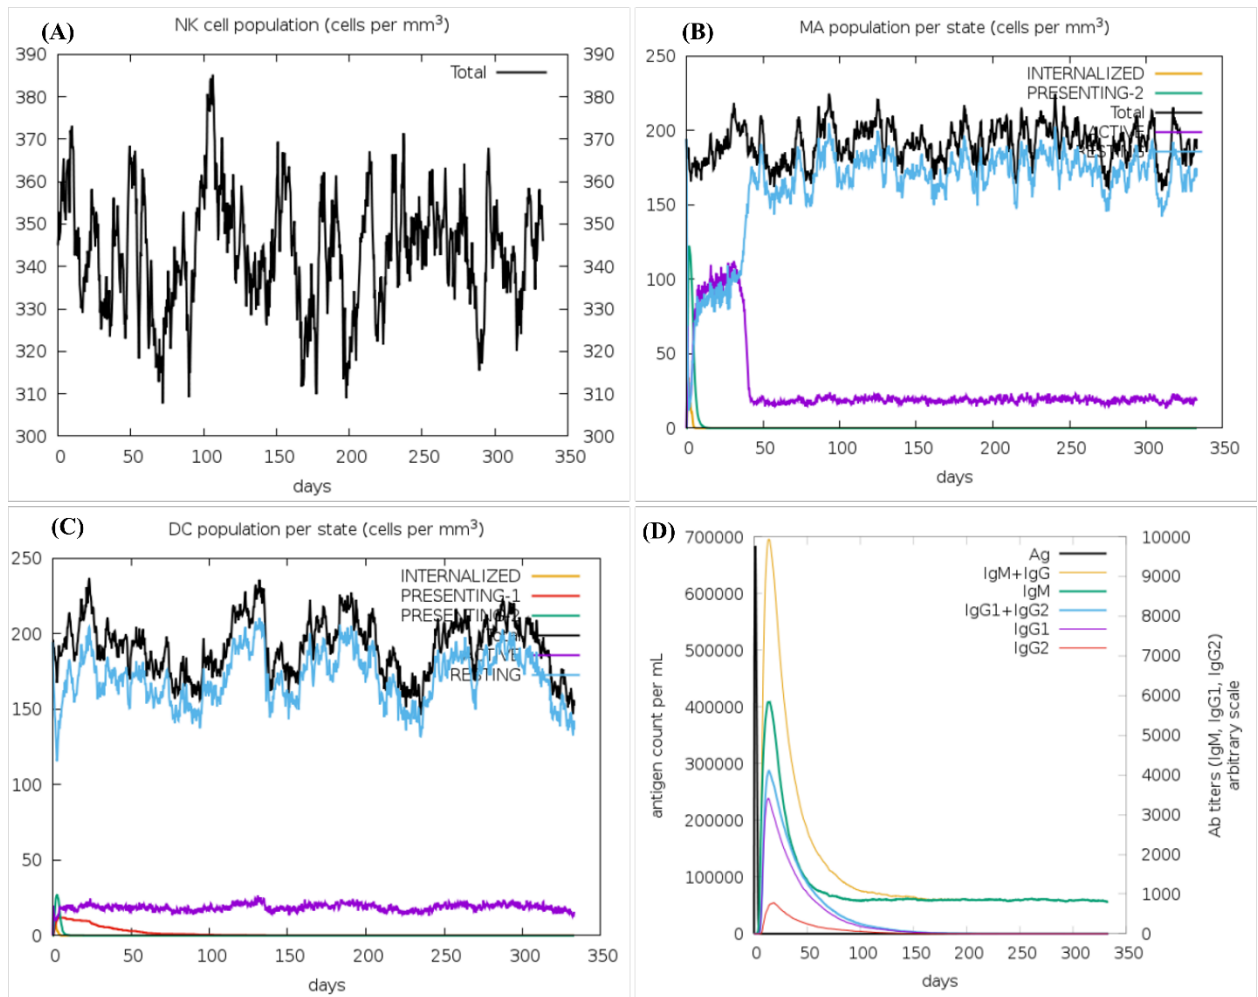

**Figure S4:** (A) NK cell population; (B) Macrophage (MA) cell population; (C) Dendritic cell (DC) population; (D) Antigen and Immune complex stimulation.

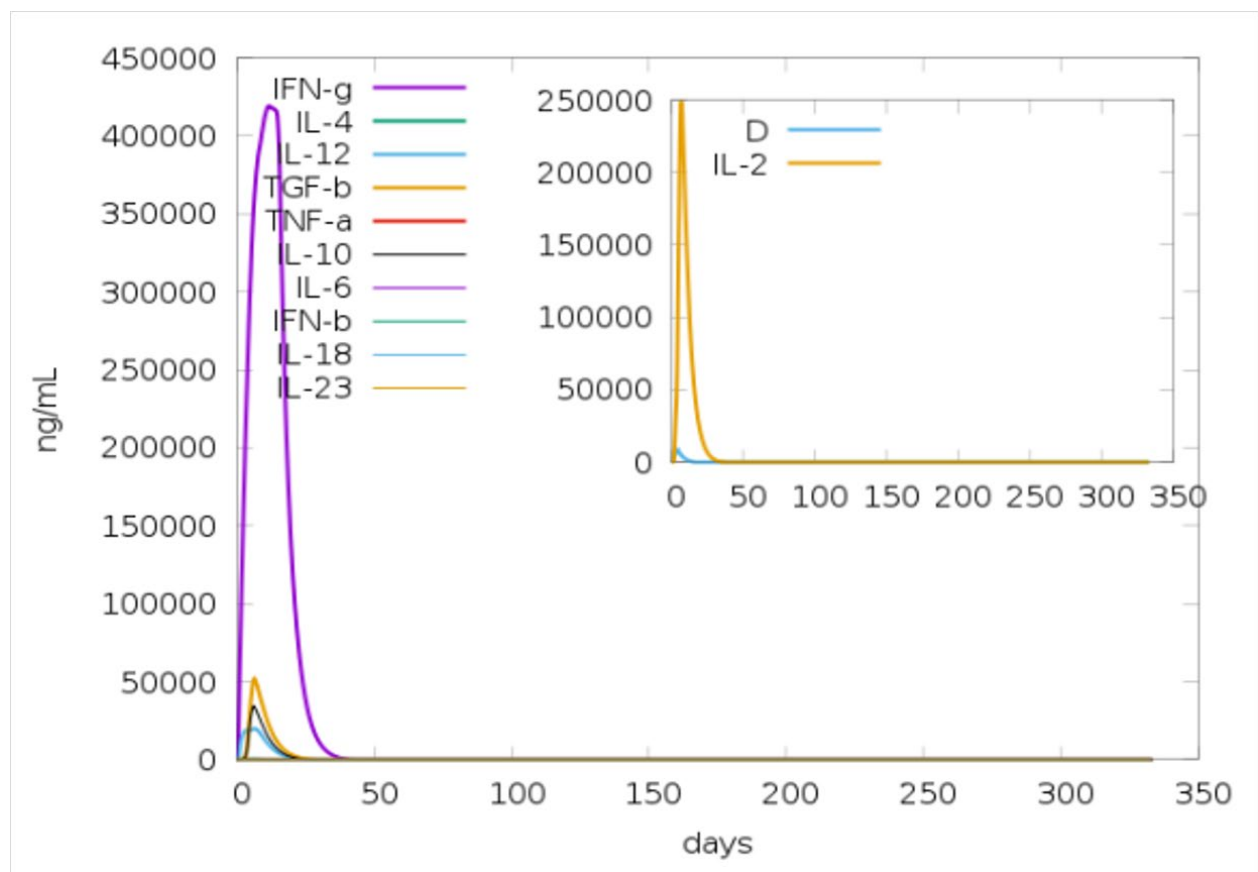

**Figure S5:** Danger signal and Cytokine stimulation.

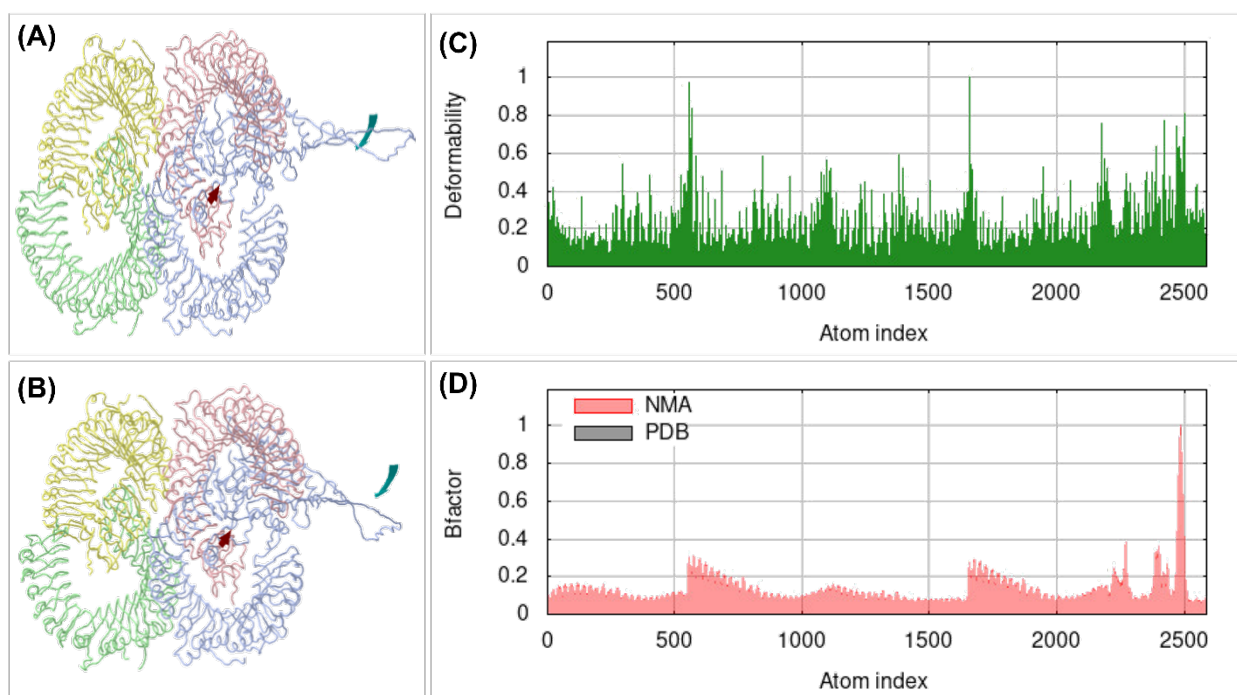

**Figure S6:** Molecular dynamics simulation of the docked complex. (A) MD simulation in the initial mode; (B) MD simulation in the final mode. A slight deformability is seen in the vaccine candidate with the green arrow showing downward movement and the red arrow showing upward movement of the residues; (C) deformability graph of the complex; (D) B-factor plot.

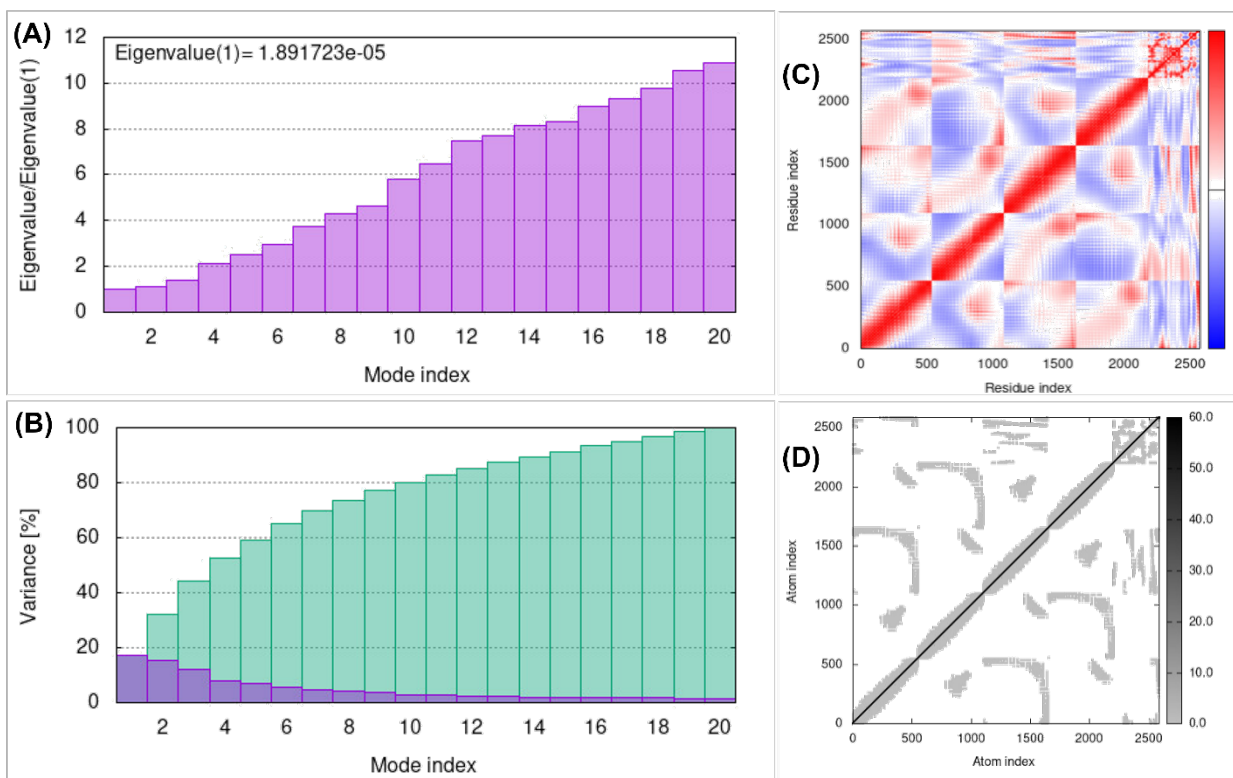

**Figure S7:** (A) eigenvalue plot. (B) variance % plot. (C) the covariance map; (D) the elastic network map of the docked complex



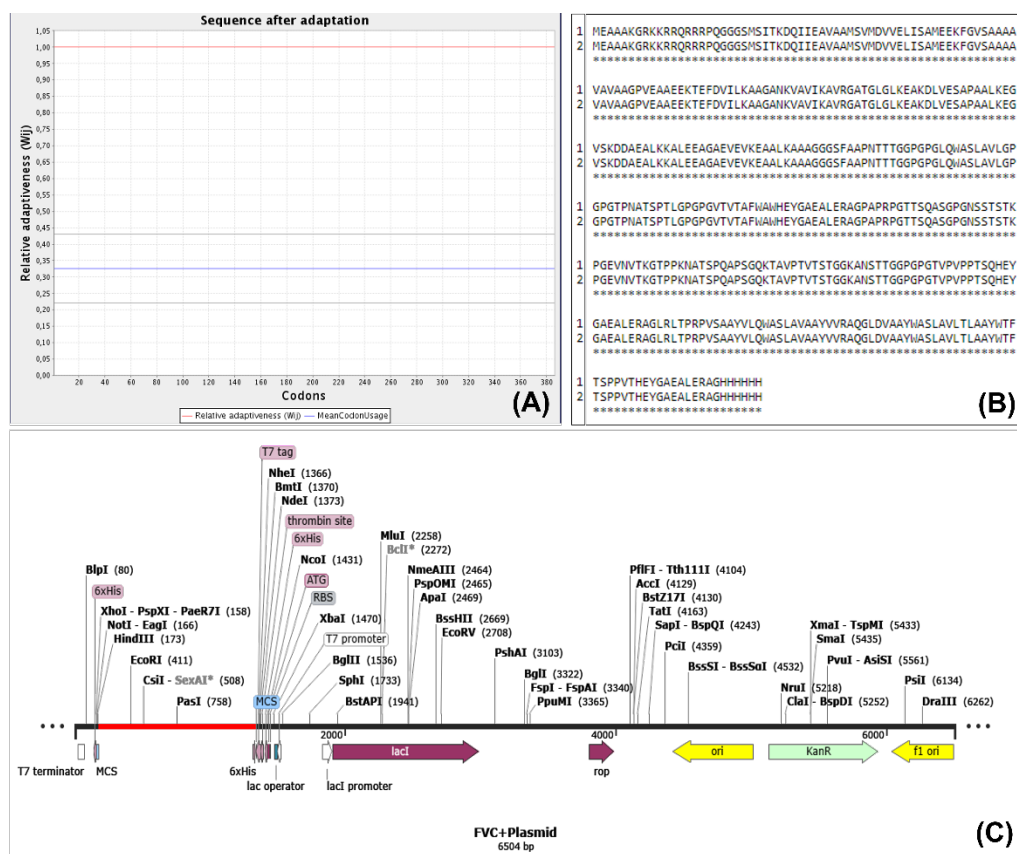

**Figure S8:** Expression analysis of the vaccine construct. (A) optimized codons with CAI 1.000 showing the maximum optimization; (B) CLUSTAL-W analysis showing 100% similarity between the pre-optimization (depicted as 1) and post-optimization (depicted as 2) vaccine constructs; (C) the linear map of cloned plasmid.



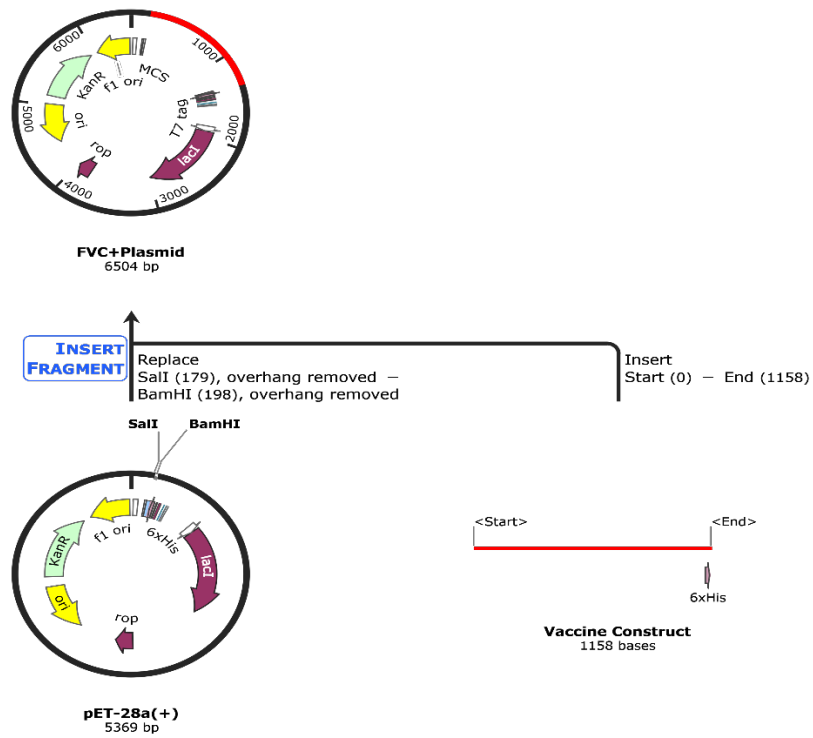

**Figure S9:** The history of *insilico* cloning.
